# Supplementary material for: Thienyltriazine-based porous organic polymers with nitrogen rich moieties: synthesis and gas selectivity study
Source: Royal Society of Chemistry journal article supplement (doi:10.1039/d3ma00353a), 2023-01-01
Supplement: d3ma00353a1.pdf [file d3ma00353a1.pdf]

## **Thienyltriazine based porous organic polymers with nitrogen rich moieties: Synthesis and gas selectivity study**

Neha Rani Kumar<sup>a,b\*</sup>, Prasenjit Das<sup>c</sup>, Abhijeet R. Agrawal<sup>a</sup>, Sanjay Kumar Mandal<sup>c\*</sup>, and Sanjio S. Zade<sup>a\*</sup>

*<sup>a</sup>Department of Chemical Sciences and Centre for Advanced Functional Materials, Indian Institute of Science Education and Research (IISER) Kolkata, Mohanpur 741246, India.*

*<sup>b</sup>Department of Chemistry, Dhemaji College, Dhemaji, Assam 787057, India*

*<sup>c</sup>Department of Chemical Sciences, Indian Institute of Science Education and Research Mohali, Sector 81, Manauli PO, S. A. S. Nagar, Mohali, Punjab 140306, India*

[\*] email: [nehakumar0926@gmail.com](mailto:nehakumar0926@gmail.com); [sanjaymandal@iisermohali.ac.in](mailto:sanjaymandal@iisermohali.ac.in);

[sanjiozade@iiserkol.ac.in](mailto:sanjiozade@iiserkol.ac.in)

## Table of Contents

| Serial No. | Title                                                        | Page No.                                                                                                                                                                                   |         |
|------------|--------------------------------------------------------------|--------------------------------------------------------------------------------------------------------------------------------------------------------------------------------------------|---------|
| 1          | Experimental Section                                         | i. General Instrumentation                                                                                                                                                                 | S3-S4   |
|            |                                                              | ii. Materials                                                                                                                                                                              | S4      |
|            |                                                              | iii. Synthesis of precursors used for polymerization; <b>Scheme S1</b>                                                                                                                     | S4-S6   |
|            |                                                              | iv. Procedure for the synthesis of porous polymers ( <b>Table S1</b> )                                                                                                                     | S6-S10  |
| 2          | Characterization of synthesized porous polymers and monomers | i. Stacked FT-IR spectra of polymer precursors and porous polymers; <b>Figure S1</b>                                                                                                       | S11     |
|            |                                                              | ii. FT-IR spectra of <b>TT-TCBz (a-g); Figure S2 (a-g)</b>                                                                                                                                 | S12     |
|            |                                                              | iii. (a) Stacked solid-state UV-vis spectra of <b>TT-CBz, TT-BCBz, TT-TCBz-b, TT-TPA</b> (b) Stacked solid-state UV-vis spectra of <b>TT-TCBz-(a-g); Figure S3</b>                         | S13     |
|            |                                                              | iv. Kubelka-Munk plot for the band gap calculation of <b>TT-CBz, TT-BCBz, TT-TCBz-b</b> and <b>TT-TPA; Figure S4</b>                                                                       | S13     |
|            |                                                              | v. Kubelka-Munk plot for the band gap calculation of <b>TT-TCBz (a-g); Figure S5</b>                                                                                                       | S14     |
|            |                                                              | vi. (a) Stacked PXRD patterns of <b>TT-CBz, TT-BCBz, TT-TCBz-b</b> and <b>TT-TPA</b> (b) Stacked PXRD patterns of <b>TT-TCBz-(a-g); Figure S6</b>                                          | S15     |
|            |                                                              | vii. (a) Stacked TGA profiles of <b>TT-CBz, TT-BCBz, TT-TCBz-b</b> and <b>TT-TPA</b> (b) Stacked TGA profiles of <b>TT-TCBz (a-g); Figure S7</b>                                           | S15     |
|            |                                                              | viii. SEM, TEM and HRTEM images of <b>TT-TCBz-(a, c, d, e, f, g); Figure S8</b>                                                                                                            | S16     |
|            |                                                              | ix. Elemental Analysis of the polymers ( <b>Table S2</b> )                                                                                                                                 | S17     |
|            |                                                              | x. Summary of the CO <sub>2</sub> adsorption capacity data of various porous polymers; ( <b>Table S3</b> )                                                                                 | S17-S22 |
|            |                                                              | xi. Summary of the CO <sub>2</sub> /N <sub>2</sub> : 15/85 (v/v) selectivity data of various POPs ( <sup>a</sup> at 273 K and 1 bar, <sup>b</sup> at 298 K and 1 bar); ( <b>Table S4</b> ) | S23-S24 |
| 3          | NMR Spectra of precursors                                    | i. <sup>1</sup> H NMR Spectrum of <b>TT-TCBz; Figure S9</b>                                                                                                                                | S24     |
|            |                                                              | ii. <sup>13</sup> C NMR Spectrum of <b>TT-TCBz; Figure S10</b>                                                                                                                             | S25     |
|            |                                                              | iii. Solid-state <sup>13</sup> C NMR spectra of <b>TT-TCBz-c; Figure S11</b>                                                                                                               | S25     |
| 14         | References                                                   | S26                                                                                                                                                                                        |         |

## Experimental section

### General Instrumentation

$^1\text{H}$  and  $^{13}\text{C}$  NMR spectra of the monomers and precursors were recorded at room temperature using a Jeol JNM-ECS 400 spectrometer (400 MHz  $^1\text{H}$ , 100 MHz  $^{13}\text{C}$ ) or Bruker Avance 500 (500 MHz  $^1\text{H}$ , 125 MHz  $^{13}\text{C}$ ) spectrometer with tetramethylsilane as the internal reference. Chemical shifts ( $\delta$ ) are expressed in parts per million (ppm). The spectra were processed using MestReNova v5 and referenced to residual protonated solvent signals ( $\text{CDCl}_3$ :  $^1\text{H}$  7.26 ppm,  $^{13}\text{C}$  77.16 ppm). Fourier transform infrared spectroscopy (FTIR) spectra were recorded in the range of 4000-400  $\text{cm}^{-1}$  using the KBr pellet technique on a Perkin-Elmer RX1 IR Spectrometer. The thermal properties of CPPs were measured by a thermogravimeter analyzer (Mettler Toledo, TGA/SDTA 851) from 40  $^\circ\text{C}$  to 800  $^\circ\text{C}$  at a heating rate of 10  $^\circ\text{C min}^{-1}$  under a nitrogen atmosphere. A Rigaku (Mini Flex II, Japan) powder X-ray diffractometer equipped with Cu  $\text{K}\alpha$  ( $\lambda = 1.54059 \text{ \AA}$ ) radiation was used to record the X-ray diffraction (XRD) patterns. Solid-state UV-vis absorption spectra were obtained using a JASCO V-670 spectrophotometer. Elemental analysis was performed using a Perkin Elmer CHN analyzer.  $\text{N}_2$  adsorption-desorption isotherms were obtained on a Micromeritics Gemini VII surface area analyzer at 77.3 K and analyzed using the Barrett-Joyner-Halenda surface/volume pore analysis. Samples were degassed at 120  $^\circ\text{C}$  under a  $\text{N}_2$  atmosphere for 12 hours. The specific surface area was determined using the Brunauer-Emmett-Teller (BET) method. A Carl Zeiss SUPRA 55VP microscope was used to obtain the field-emission scanning electron microscopy (FESEM) images after coating the sample with Au film. Transmission electron microscopy (TEM) images were recorded using a JEOL JEM-2100F microscope at the Department of Science and Technology, Fund for Improvement of S&T Infrastructure in Higher Educational Institutions (DST-FIST) facility of IISER Kolkata. The  $^1\text{H}$ - $^{13}\text{C}$  CP/MAS NMR spectra were recorded on a Bruker AVANCE 500-MHz type ( $^1\text{H}$ , 500 MHz;  $^{13}\text{C}$ , 125 MHz) spectrometer at a spinning speed of 8 KHz and a relaxation delay of 10 seconds. UV-visible absorption spectra were recorded using an Agilent Cary60 UV-Vis spectrophotometer.  $\text{CO}_2$  sorption data were recorded for pressures in the range 0–1.2 bar by the volumetric method using a BELSORP MAXinstrument. Isothermic heats of adsorption ( $Q_{\text{st}}$ ) were calculated using the Clausius-Clapeyron equation based on pure-component isotherms collected at three different temperatures of 263 K, 273 K, and 298 K. These calculations were performed using

the “Heat of Adsorption” function embedded in the Belsorp Adsorption/Desorption DataAnalysis software version 6.3.1.0.

## Materials

The reagents obtained from commercial sources (Sigma Aldrich, Spectrochem, Merck and Alfa Aesar) were used as received, without further purification unless otherwise specified. Toluene and Tetrahydrofuran (THF) were dried over sodium/benzophenone before use. Dry reactions were conducted in oven-dried glassware, utilizing a standard Schlenk line under an inert atmosphere of dry nitrogen. Dimethylformamide (DMF) for polymerization reactions was dried over calcium hydride followed by distillation under vacuum. Triethylamine was dried over potassium hydroxide (KOH) flakes. Dichloroethane (DCM) and chloroform ( $\text{CHCl}_3$ ) were dried over calcium chloride. Solvents for Soxhlet extraction were used directly as obtained from commercial sources.

## Procedure for the synthesis of precursors and polymers

### Synthesis of 2,4,6-tris(5-ethynylthiophen-2-yl)-1,3,5-triazine (TE-TT)

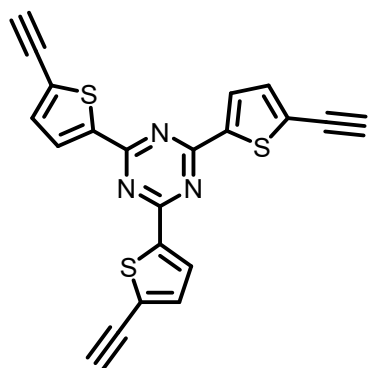

2,4,6-tris(5-ethynylthiophen-2-yl)-1,3,5-triazine (**TT-TE**) was synthesized from 2-cyanothiophene according to the procedure reported by Misra and group.<sup>1</sup>  $^1\text{H}$  data was consistent with the reported values.  $^1\text{H}$  NMR of **TE-TT** (400 MHz, Jeol,  $\text{CDCl}_3$ ):  $\delta$  ppm 8.04 (d, 1H,  $J = 4$  Hz); 7.30 (d, 1H,  $J = 4$  Hz); 3.52 (s, 1H).

### Synthesis of 3,6-dibromo-9H-carbazole (CBz)

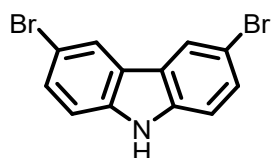

3,6-dibromo-9*H*-carbazole was synthesized by using the method reported by Faulkner.<sup>2</sup>

### Synthesis of 3,3',6,6'-tetrabromo-9,9'-bicarbazole (BCBz)

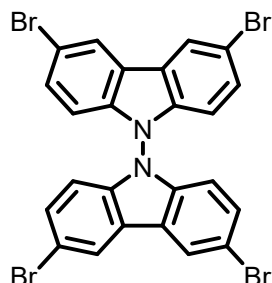

3,3',6,6'-tetrabromo-9,9'-bicarbazole was synthesized by using the method reported by Chen and co-workers.<sup>3</sup>

### Synthesis of 9,9'-((6-(5-(1,2,3,4-tetrahydro-9*H*-carbazol-9-yl)thiophen-2-yl)-1,3,5-triazine-2,4-diyl)bis(thiophene-5,2-diyl))bis(9*H*-carbazole) (TT-TCBz)

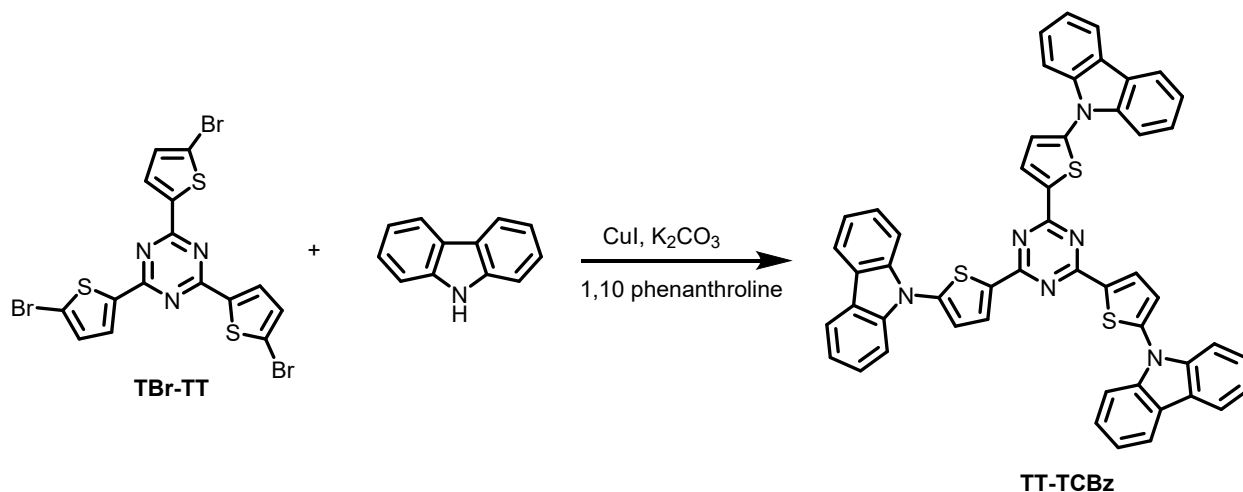

**Scheme S1.** Synthesis of **TT-TCBz**

**TT-TCBz** was synthesized using an approach used by Han and group for the synthesis of a monomer, in which thienyltriazine is replaced by benzene.<sup>4</sup> Under a nitrogen atmosphere, a 250 mL flask was charged potassium carbonate (20.0 mmol), copper iodide (4.0 mmol), 1,10-phenanthroline (0.4 mmol), carbazole (16 mmol), 1,3,5-tribromobenzene (4.0 mmol), and dry *N,N*-dimethylformamide (80 mL). The reaction mixture was stirred for 30 minutes at room temperature and then heated to 110 °C for 3 days. After cooling to room temperature, water was added under

stirring, and the suspension was filtered. The solid was washed with water, then with an excess amount of petroleum, and finally with methanol. A bright yellow-colored solid, **TT-TCBz** was obtained in around 70% yield.  $^1\text{H}$  NMR ( $\text{CDCl}_3$ , 400 MHz)  $\delta$  (ppm): 7.33-7.36 (m, 3H); 7.49 (t, 2H,  $J = 8$  Hz), 7.68-7.71 (m, 2H), 8.13 (d, 2H,  $J = 8$  Hz), 8.40-8.42 (m, 1H);  $^{13}\text{C}$  NMR ( $\text{CDCl}_3$ , 100 MHz)  $\delta$  (ppm): 110.38, 120.33, 121.20, 123.83, 125.04, 126.52, 131.27, 137.65, 141.03, 145.43, 167.27; HRMS:  $m/z$  calculated:  $(\text{M}+\text{Na})^+$  i.e.  $\text{C}_{51}\text{H}_{34}\text{N}_6\text{S}_3\text{Na}$  849.1905, found: 849.1901.

### Synthesis of tris(4-bromophenyl)amine (TPA)

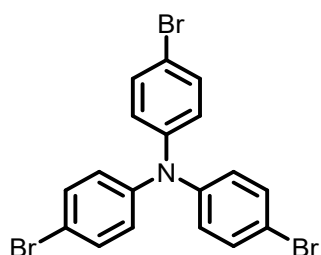

tris(4-bromophenyl)amine was synthesized by using the method reported by Yoshizawa and co-workers.<sup>5</sup>

### Synthesis of polymers **TT-CBz**, **TT-BCBz**, **TT-TPA** by Sonogashira-Hagihara Coupling Reaction

Polymers **TT-CBz**, **TT-BCBz**, and **TT-TPA** were synthesized by using standard Sonogashira-Hagihara coupling reaction. A 50 mL oven-dried three-neck round bottom flask fitted with a reflux condenser and a nitrogen purger on the top was charged with a small magnetic stirring bar. The reaction vessel was degassed and purged with nitrogen multiple times. Then, the flask was charged with bromo precursor and 2,4,6-tris(5-ethynylthiophen-2-yl)-1,3,5-triazine (**TE-TT**). 7 mL anhydrous dimethylformamide (DMF) and 7 mL anhydrous triethylamine ( $\text{Et}_3\text{N}$ ) were added to the flask under nitrogen, followed by the addition of tetrakis(triphenylphosphine)palladium, i.e.,  $\text{Pd}(\text{PPh}_3)_4$  (5 mol%) and copper(I)iodide ( $\text{CuI}$ ), (5 mol%). The reaction mixture was stirred at 130 °C for 72 hours under a nitrogen atmosphere. The mixture was then cooled to room temperature, and the precipitated polymer was filtered and washed three times with dichloromethane, water, methanol and acetone (100 mL each) to remove

any unreacted monomers or catalyst residues. Further purification of the polymer was done by Soxhlet extraction with methanol, chloroform, tetrahydrofuran, and acetone for 24 hours each.

**The amount of the reactants used are given below**

**For polymer TT-CBz:** Acetylene derivative of thienyltriaizne, **TE-TT:** 0.300 g, 0.75 mmol, 1 equivalent and 3,6-dibromo-9*H*-carbazole: 0.243 g, 0.75 mmol, 1 equivalent. Color: brown, Yield: 93%

**For polymer TT-BCBz:** Acetylene derivative of thienyltriaizne, **TE-TT:** 0.350 g, 0.87 mmol, 1 equivalent and 3,3',6,6'-tetrabromo-9,9'-bicarbazole: 0.422 g, 0.65 mmol, 0.75 equivalent; Color: brown, Yield: 90%

**For polymer TT-TPA:** Acetylene derivative of thienyltriaizne, **TE-TT:** 0.250 g, 0.625 mmol, 1 equivalent and tris(4-bromophenyl)amine: 0.422 g, 0.65 mmol, 0.75 equivalent, Color: brown, Yield: 95%

**Synthesis of polymers TT-TCBz-(a-g)**

Polymers belonging to **TT-TCBz-(a-g)** series were synthesized under different reaction conditions to study the effect of reaction conditions on FeCl<sub>3</sub>-mediated polymerization. The reactions were done under three different types of polymerizations: Oxidative Polymerization (OP), Friedel-Crafts polymerization (FCP) and Competitive Oxidative/Friedel-Crafts Polymerization (CO/FC-P). The detailed reaction conditions are provided below and summarized in **Table S1**.

**a) Oxidative Polymerization (OP)**

Synthesis of polymer **TT-TCBz-a**

A 250 mL two-necked round-bottomed flask was charged with compound **TT-TCBz** (1.2 g, 1.45 mmol, 1 equivalent). The flask was thoroughly evacuated and then filled with nitrogen. This was then followed by the addition of dry CHCl<sub>3</sub> (75 mL). The mixture was stirred for 5 minutes. In a separate single-necked flask, FeCl<sub>3</sub> (9.4 g, 58 mmol, 40 equivalent) was dissolved in CHCl<sub>3</sub> (10 mL). This mixture was added to the flask containing **TT-TCBz**. The mixture was then stirred at room temperature for 72 hours. The reaction was quenched by the addition of methanol. The resulting solid was filtered and thoroughly washed with water, tetrahydrofuran, methanol and

6 N HCl aq. Washing was continued until the filtrate was colorless. This precipitate was then subjected to Soxhlet extraction with methanol, dichloromethane, tetrahydrofuran, and acetone for 24 hours per solvent. The polymer **TT-TCBz-a** was obtained as a yellow color solid in 89% yield.

#### Synthesis of polymer **TT-TCBz-b**

A 250 mL two-necked round-bottomed flask was charged with compound **TT-TCBz** (1.2 g, 1.45 mmol, 1 equivalent). The flask was thoroughly evacuated and filled with nitrogen. This was then followed by the addition of dry  $\text{CHCl}_3$  (75 mL). The mixture was stirred for 5 minutes. In a separate single-necked flask  $\text{FeCl}_3$  (9.4 g, 58 mmol, 40 equivalent) was dissolved in  $\text{MeNO}_2$  (30 mL). This mixture was added to the flask containing **TT-TCBz**. The mixture was then stirred at room temperature for 72 hours. The reaction was then quenched by the addition of methanol. The resulting solid was filtered and thoroughly washed with water, tetrahydrofuran, methanol and 6 N HCl aq. Washing was continued until the filtrate was colorless. This precipitate was then subjected to Soxhlet extraction with methanol, dichloromethane, tetrahydrofuran, and acetone for 24 h per solvent. The polymer **TT-TCBz-b** was obtained as a yellow color solid with 89% yield.

#### Synthesis of polymer **TT-TCBz-c**

A 100 mL two-necked round-bottomed flask was charged with compound **TT-TCBz** (600 mg, 0.73 mmol, 1 equivalent). The flask was thoroughly evacuated and filled with nitrogen. This was then followed by the addition of dry dichloroethane (35 mL). The mixture was stirred for 5 minutes. In a separate single-necked flask,  $\text{FeCl}_3$  (4.6 g, 29 mmol, 40 equivalent) was dissolved in dichloroethane (10 mL). This mixture was added to the flask containing **TT-TCBz**, and the temperature of the flask was raised to 80 °C. The mixture was stirred for 72 hours under this condition. The reaction was then quenched by the addition of methanol. The resulting solid was filtered and washed thoroughly with water, tetrahydrofuran, methanol and 6 N HCl aq. Washing was continued until the filtrate was colorless. This precipitate was then subjected to Soxhlet extraction with methanol, dichloromethane, tetrahydrofuran, and acetone for 24 h per solvent. The polymer **TT-TCBz-c** was obtained as a yellow color solid in 93% yield.

#### Synthesis of polymer **TT-TCBz-d**

A 100 mL two-necked round-bottomed flask was charged with compound **TT-TCBz** (600 mg, 0.73 mmol, 1 equivalent). The flask was then thoroughly evacuated and filled with nitrogen.



This was then followed by the addition of dry dichloroethane (35 mL). The mixture was stirred for 5 minutes. In a separate single-necked flask, FeCl<sub>3</sub> (4.6 g, 29.16 mmol, 40 equivalent) was dissolved in MeNO<sub>2</sub> (10 mL). This mixture was added to the flask containing **TT-TCBz**. The mixture was stirred for 72 hours under this condition. The reaction was then quenched by the addition of methanol. The resulting solid was filtered and thoroughly washed with water, tetrahydrofuran, methanol and 6 N HCl aq. Washing was continued until the filtrate was colorless. This precipitate was subsequently subjected to Soxhlet extraction with methanol, dichloromethane, tetrahydrofuran, and acetone for 24 h per solvent. The polymer **TT-TCBz-d** was obtained as a yellow color solid in 90% yield.

#### Synthesis of polymer **TT-TCBz-e**

A 100 mL two-necked round-bottomed flask was charged with compound **TT-TCBz** (600 mg, 0.73 mmol, 1 equivalent). The flask was then thoroughly evacuated and filled with nitrogen. This was then followed by the addition of dry CHCl<sub>3</sub> (35 mL). The mixture was stirred for 5 minutes. In a separate single-necked flask FeCl<sub>3</sub> (4.6 g, 29.16 mmol, 40 equivalent) was dissolved in MeNO<sub>2</sub> (10 mL). This mixture was added to the flask containing **TT-TCBz**, and the temperature of the mixture was raised to 60 °C. The mixture was stirred for 72 hours under this condition. The reaction was then quenched by the addition of methanol. The resulting solid was filtered and thoroughly washed with water, tetrahydrofuran, methanol and 6 N HCl aq. Washing was continued until the filtrate was colorless. This precipitate was then subjected to Soxhlet extraction with methanol, dichloromethane, tetrahydrofuran, and acetone for 24 h per solvent. The polymer **TT-TCBz-e** was obtained as a yellow color solid in 90% yield.

#### **b) Friedel-Crafts polymerization (FCP)**

A two-necked round-bottomed flask was charged with a stirring bar, **TT-TCBz** (600 mg, 0.17 mmol, 1 equivalent) and FeCl<sub>3</sub> (4.6 g, 29.16 mmol, 40 equivalent). The flask was thoroughly evacuated and filled with nitrogen. Dry dichloroethane (20 mL) was introduced, and the mixture was stirred for 5 minutes. While stirring, the color of the mixture changed to purple-red. This was followed by the slow addition of dimethoxyethane (2.23 g or 2.5 mL, 29.16 mmol, 40 equivalent) through a syringe with continuous stirring. During this process, the colour of the mixture changed to light brown. The mixture was stirred for 72 hours under this condition. The reaction was then

quenched by adding methanol. The resulting solid was filtered and thoroughly washed with water, tetrahydrofuran, methanol, and 6 N HCl aq. Washing was continued until the filtrate was colorless. This precipitate was then subjected to Soxhlet extraction with methanol, dichloromethane, tetrahydrofuran, and acetone for 24 hours per solvent. The polymer **TT-TCBz-f** was obtained as a yellow-colored solid with 94% yield.

### c) Competitive Oxidative/Friedel-Crafts Polymerization (CO/FC-P)

A two-necked round-bottomed flask was charged with a stirring bar, **TT-TCBz** (600 mg, 0.17 mmol, 1 equivalent) and FeCl<sub>3</sub> (4.6 g, 29.16 mmol, 40 equivalent). The flask was thoroughly evacuated and then filled with nitrogen. Dry dichloroethane (20 mL) was introduced, and the mixture was stirred for 5 minutes. While stirring, the color of the mixture changed to purple-red. This was followed by the gradual addition of dimethoxyethane (2.23 g or 2.5 mL, 29.16 mmol, 40 equivalent) through a syringe with continuous stirring. During this process, the color of the mixture changed to light brown. The reaction mixture was stirred under these conditions for 15 minutes, after which the temperature was raised to 80 °C. The mixture was stirred for 72 hours under this condition. The reaction was then quenched by the addition of methanol. The resulting solid was filtered and thoroughly washed with water, tetrahydrofuran, methanol and 6 N HCl aq. Washing was continued until the filtrate was colorless. This precipitate was then subjected to Soxhlet extraction with methanol, dichloromethane, tetrahydrofuran, and acetone for 24 hours per solvent. The polymer **TT-TCBz-g** was obtained as a yellow color solid with 88% yield.

**Table S1.** Synthesis of polymer of **TT-TCBz** under different reaction conditions to give polymers **TT-TCBz-a**, **TT-TCBz-b**, **TT-TCBz-c**, **TT-TCBz-d**, **TT-TCBz-e**, **TT-TCBz-f**, and **TT-TCBz-g**, respectively.

| Polymer          | Polymerization type | Reaction conditions                                                                                                        | Color of polymer | Yield |
|------------------|---------------------|----------------------------------------------------------------------------------------------------------------------------|------------------|-------|
| <b>TT-TCBz-a</b> | OP                  | CHCl <sub>3</sub> , FeCl <sub>3</sub> , rt, 72 h                                                                           | Yellow           | 89%   |
| <b>TT-TCBz-b</b> | OP                  | CHCl <sub>3</sub> , MeNO <sub>2</sub> , FeCl <sub>3</sub> , rt, 72 h                                                       | Yellow           | 89%   |
| <b>TT-TCBz-c</b> | OP                  | DCE, FeCl <sub>3</sub> , 80 °C, 72 h                                                                                       | Yellow           | 93%   |
| <b>TT-TCBz-d</b> | OP                  | DCE, MeNO <sub>2</sub> , FeCl <sub>3</sub> , 80 °C, 72 h                                                                   | Yellow           | 90%   |
| <b>TT-TCBz-e</b> | OP                  | CHCl <sub>3</sub> , MeNO <sub>2</sub> , FeCl <sub>3</sub> , 60 °C, 72 h                                                    | Yellow           | 90%   |
| <b>TT-TCBz-f</b> | FCP                 | DCE, FeCl <sub>3</sub> , rt, 72 h,     | Yellow           | 94%   |
| <b>TT-TCBz-g</b> | CO/FCP              | DCE, FeCl <sub>3</sub> , 80 °C, 72 h,  | Yellow           | 88%   |

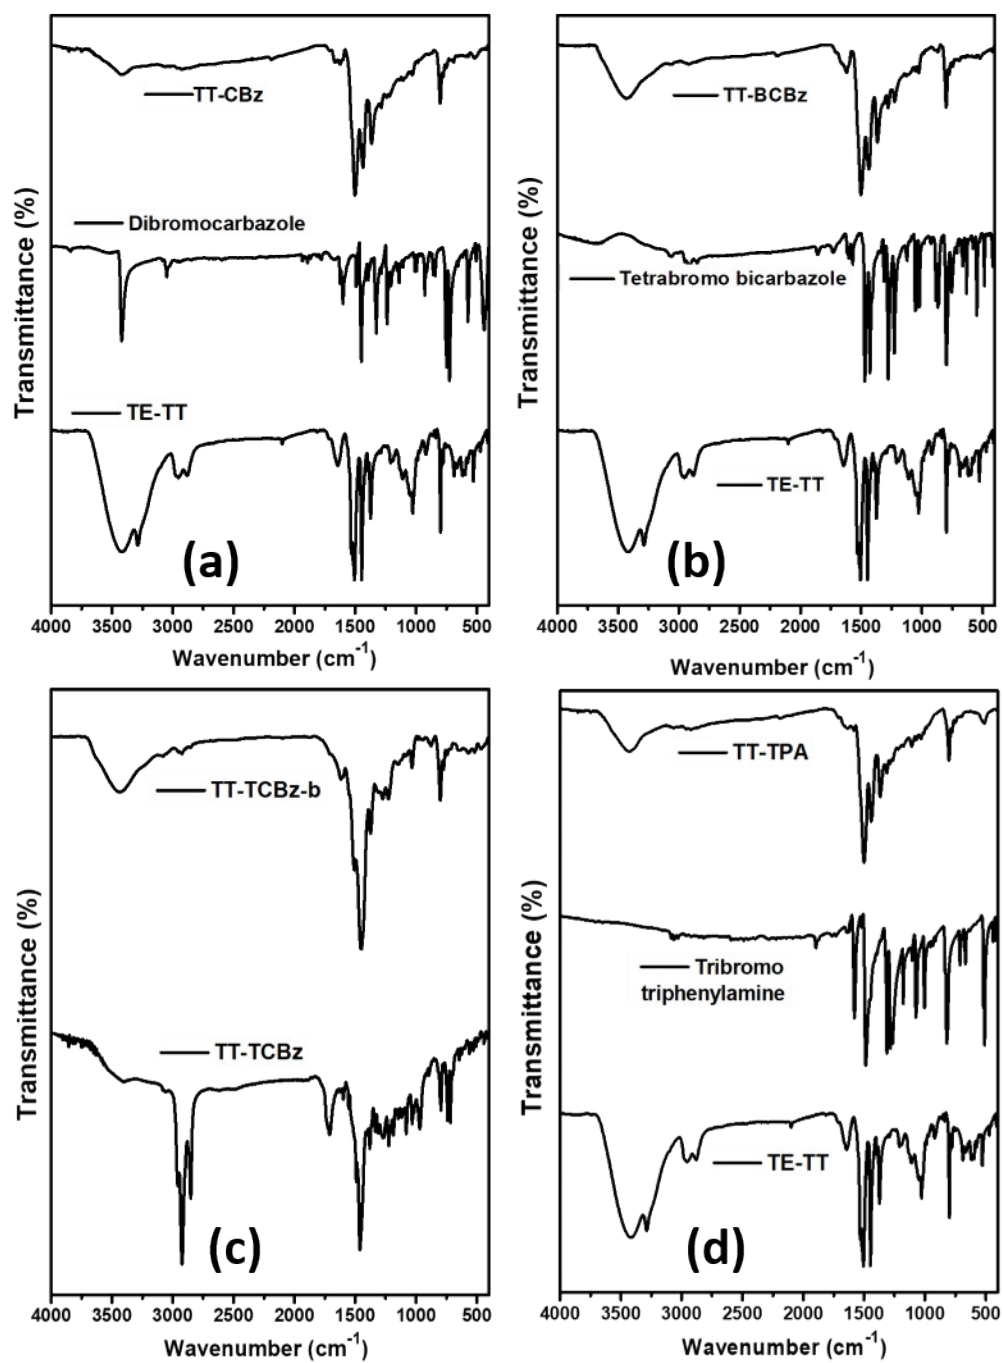

**Figure S1.** Stacked FT-IR Spectra of polymer precursors and porous polymers.

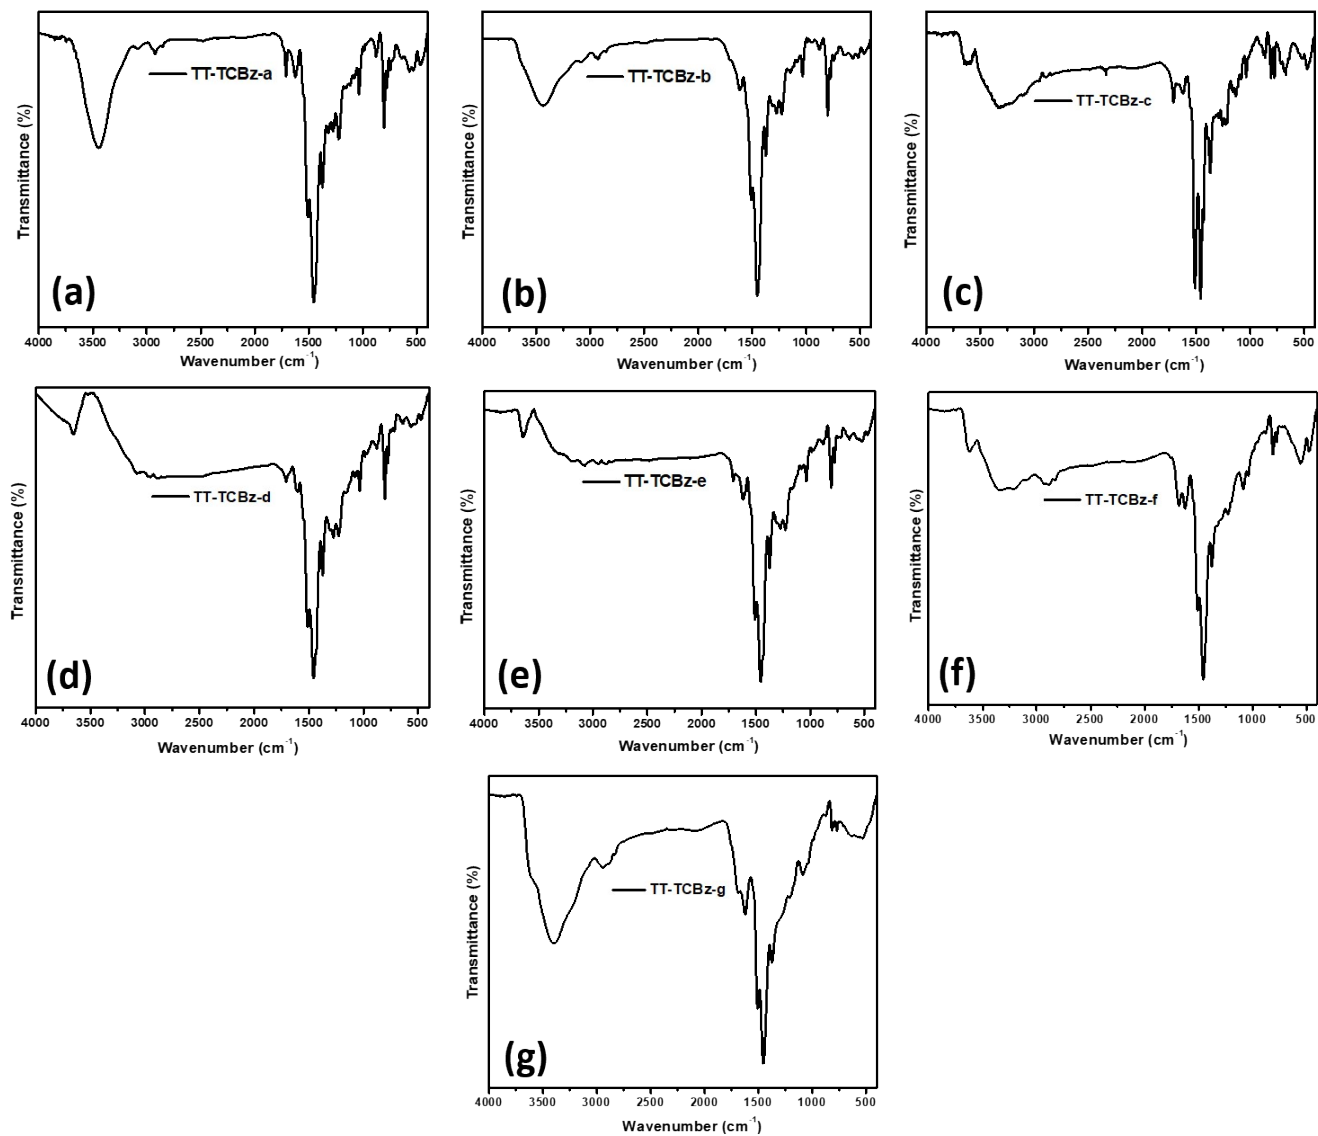

**Figure S2.** FT-IR Spectra of (a) TT-TCBz-a, (b) TT-TCBz-b, (c) TT-TCBz-c, (d) TT-TCBz-d, (e) TT-TCBz-e, (f) TT-TCBz-f, and (g) TT-TCBz-g, respectively.

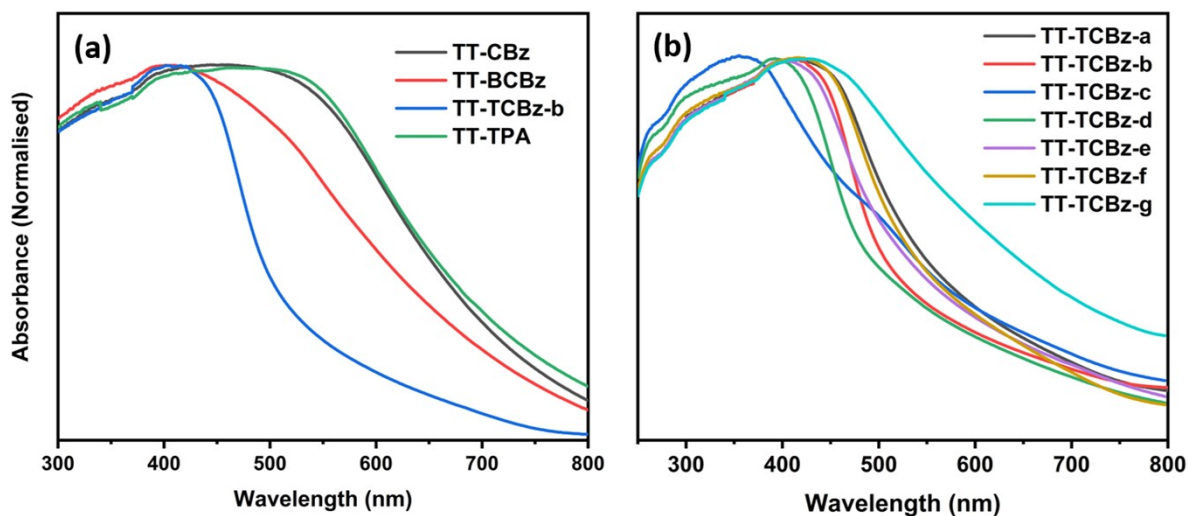

**Figure S3.** (a) Stacked solid-state UV-visible spectra of TT-CBz, TT-BCBz, TT-TCBz-b and TT-TPA, (b) Stacked solid-state UV-visible spectra of TT-TCBz-(a-g)

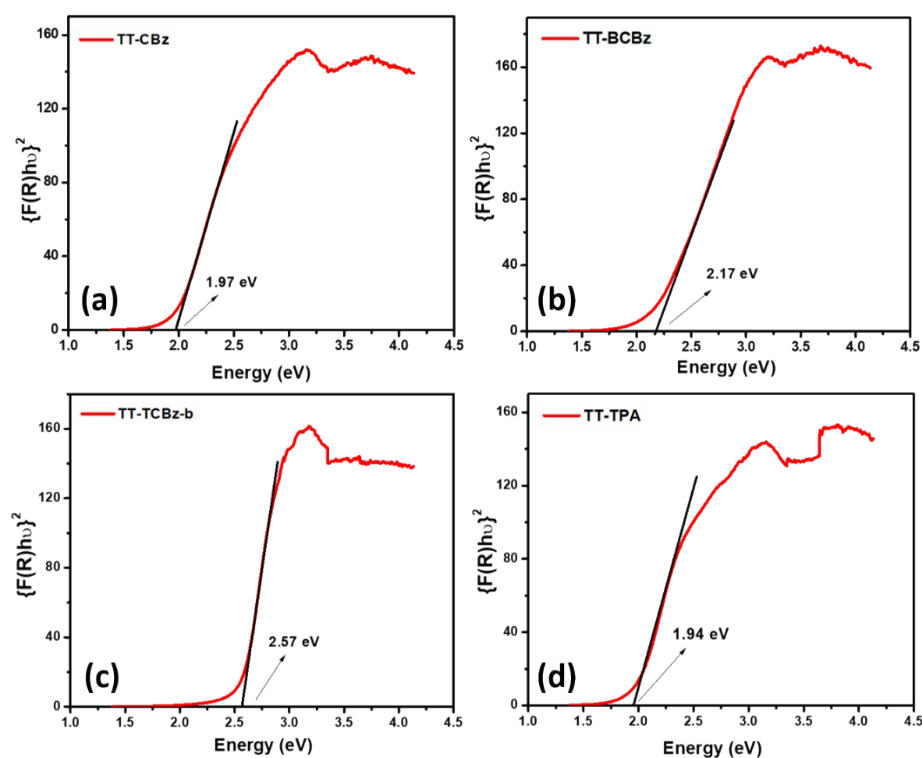

**Figure S4.** Kubelka-Munk plot for the band gap calculation of TT-CBz, TT-BCBz, TT-TCBz-b and TT-TPA

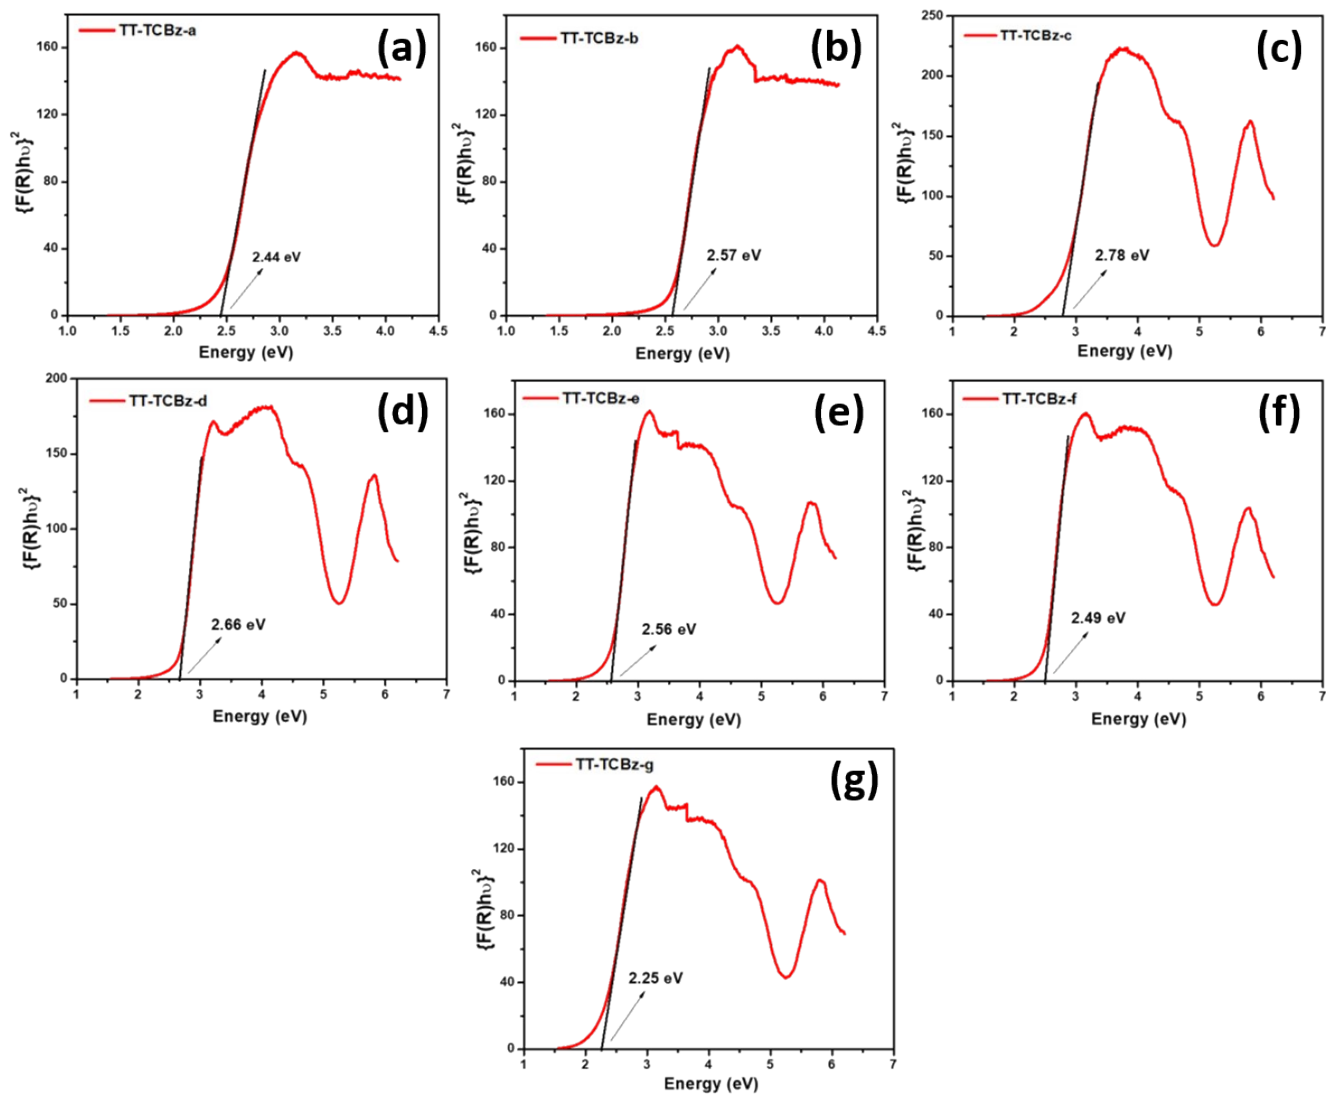

**Figure S5.** Kubelka-Munk plot for the band gap calculation of TT-TCBz (a-g)

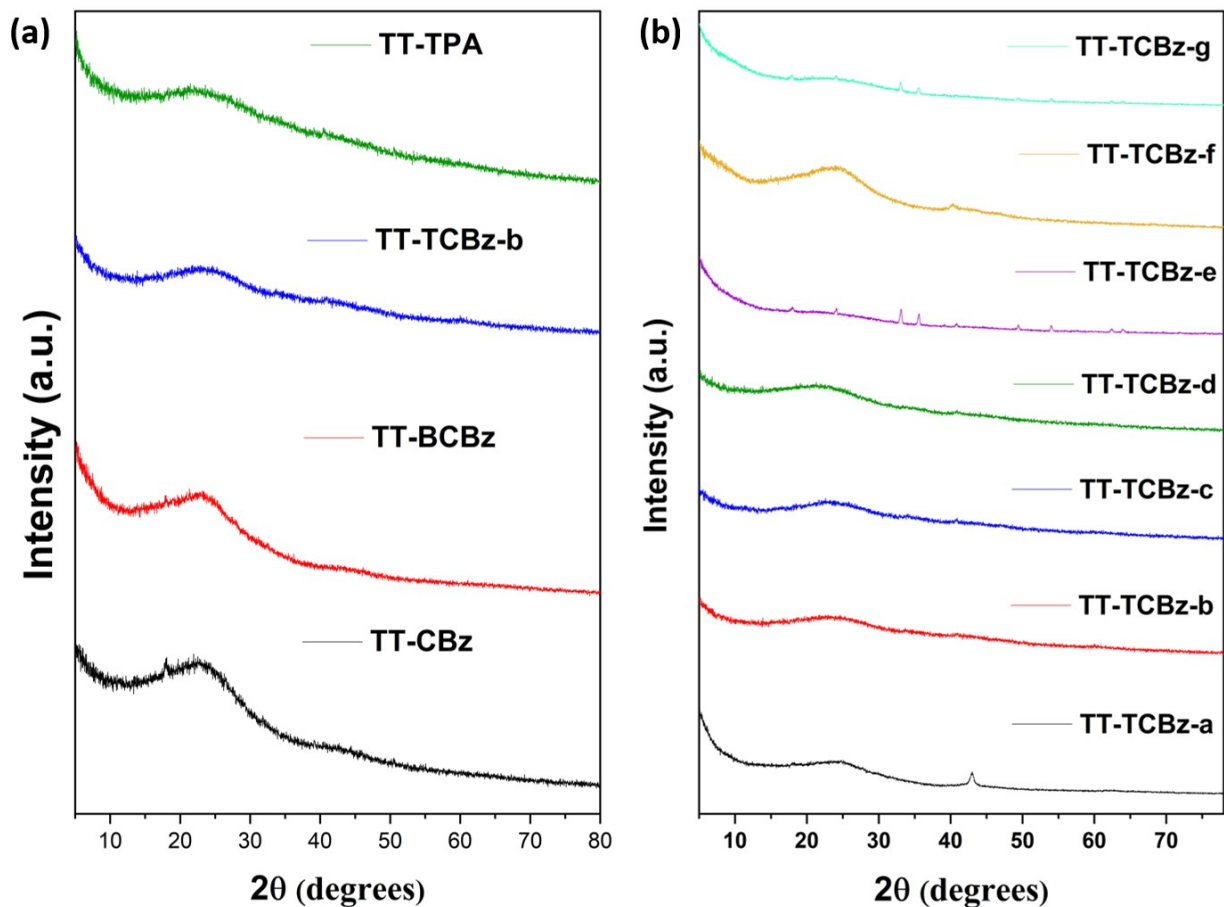

**Figure S6.** (a) Stacked powder X-ray patterns of TT-CBz, TT-BCBz, TT-TCBz-b and TT-TPA  
 (b) Stacked powder X-ray patterns of TT-TCBz (a-g)

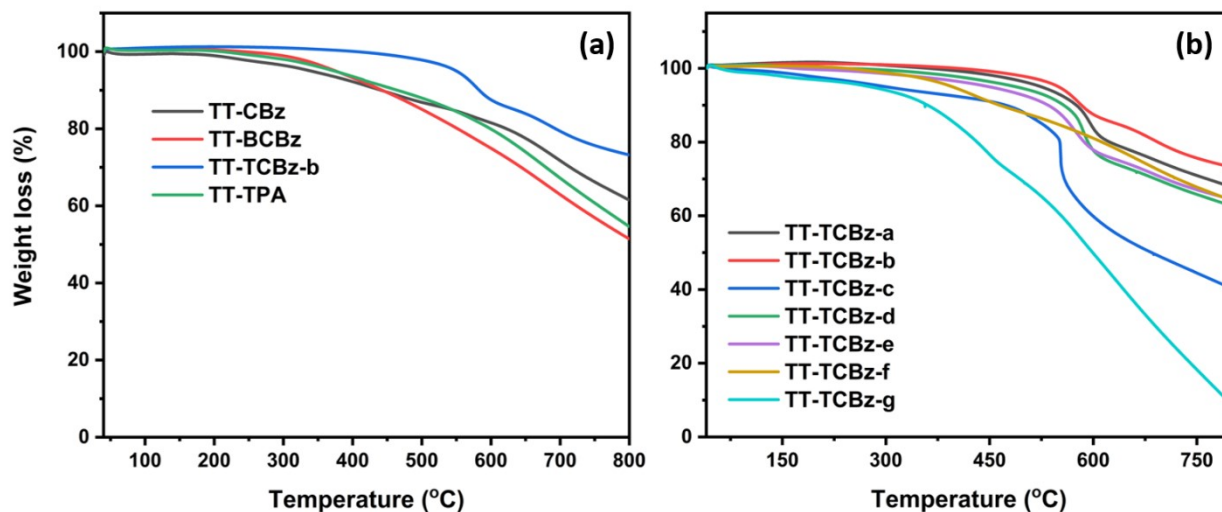

**Figure S7.** (a) Stacked TGA profiles of TT-CBz, TT-BCBz, TT-TCBz-b and TT-TPA. (b) Stacked TGA profiles of TT-TCBz (a-g), respectively.

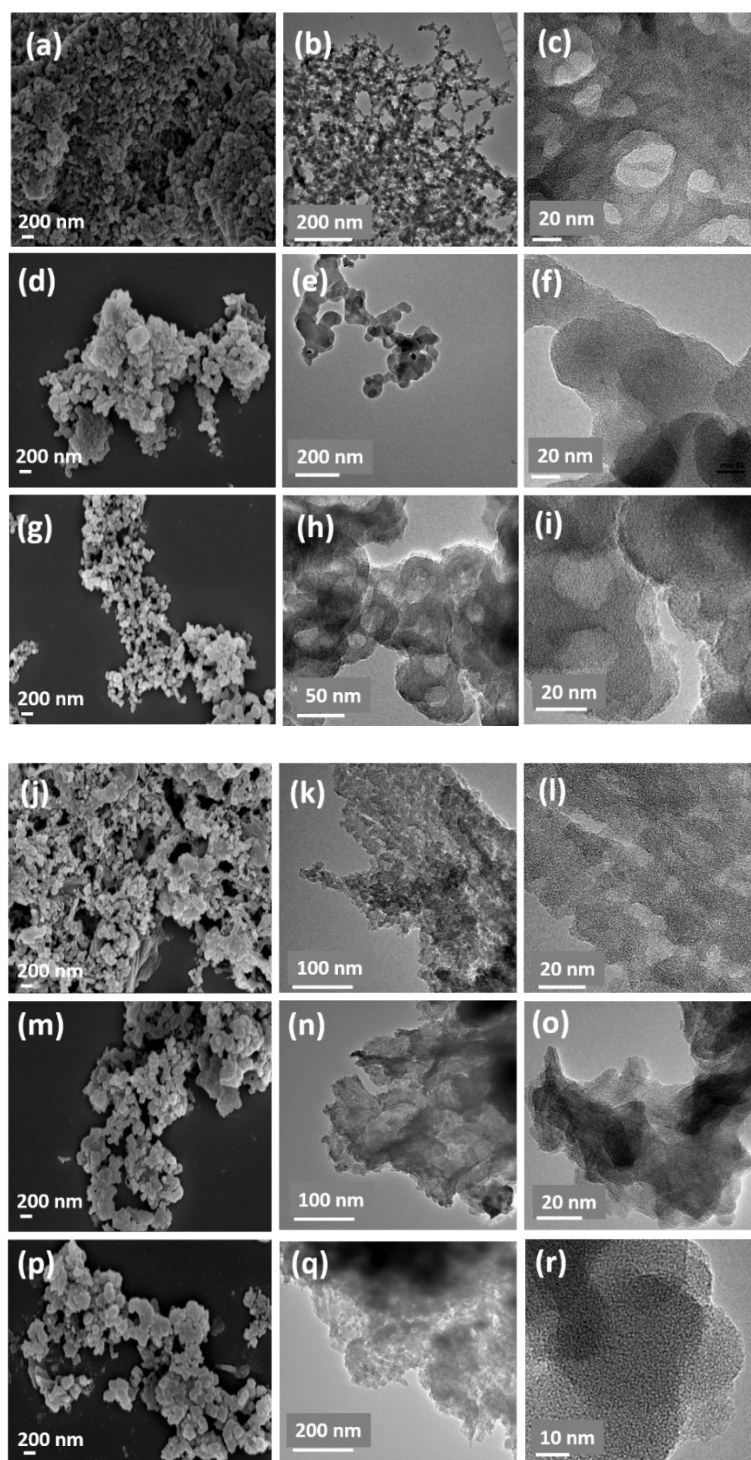

**Figure S8.** SEM images of (a) TT-TCBz-a (d) TT-TCBz-c, (g) TT-TCBz-d (j) TT-TCBz-e (m) TT-TCBz-f and (p) TT-TCBz-g; TEM images of (b) TT-TCBz-a (e) TT-TCBz-c (h) TT-TCBz-d (k) TT-TCBz-e (n) TT-TCBz-f and (q) TT-TCBz-g; HRTEM images of (c) TT-TCBz-a (f) TT-TCBz-c (i) TT-TCBz-d (l) TT-TCBz-e (o) TT-TCBz-f, and (r) TT-TCBz-g, respectively.



**Table S2.** Elemental analysis of the polymers

| Polymer   | Theoretical values             | Observed values               |
|-----------|--------------------------------|-------------------------------|
| TT-CBz    | C = 70.57, H = 2.33, N = 9.98  | C = 64.78, H = 1.92, N = 8.79 |
| TT-BCBz   | C = 74.57, H = 2.50, N = 9.66  | C = 69.54, H = 2.21, N = 9.12 |
| TT-TPA    | C = 73.37, H = 3.39, N = 8.56  | C = 68.24, H = 2.23, N = 7.89 |
| TT-TCBz-a | C = 74.98, H = 2.96, N = 10.29 | C = 72.97, H = 2.54, N = 9.81 |
| TT-TCBz-b | C = 74.98, H = 2.96, N = 10.29 | C = 72.97, H = 2.54, N = 9.81 |
| TT-TCBz-c | C = 74.98, H = 2.96, N = 10.29 | C = 71.83, H = 2.66, N = 9.42 |
| TT-TCBz-d | C = 74.98, H = 2.96, N = 10.29 | C = 72.49, H = 2.89, N = 9.16 |
| TT-TCBz-e | C = 74.98, H = 2.96, N = 10.29 | C = 71.38, H = 2.85, N = 9.75 |
| TT-TCBz-f | C = 76.49, H = 3.38, N = 9.39  | C = 68.24, H = 3.21, N = 8.54 |
| TT-TCBz-g | -                              | C = 67.42, H = 2.89, N = 8.87 |

\*\*The theoretical values of elemental analysis for TT-TCBz-g have not been calculated as the exact number of methylene units is not known.

**Table S3.** Summary of the CO<sub>2</sub> adsorption capacity data of various CPPs.

| Entry     | Material  | S <sub>ABET</sub><br>(m <sup>2</sup> g <sup>-1</sup> ) | Temperature<br>(K) | Pressure<br>(bar) | Adsorption<br>capacity<br>(mmol g <sup>-1</sup> ) | Reference                                                   |
|-----------|-----------|--------------------------------------------------------|--------------------|-------------------|---------------------------------------------------|-------------------------------------------------------------|
| 1         | TT-TCBz-a | 637                                                    | 263                | 1                 | 2.61                                              | <i>This work</i>                                            |
|           |           |                                                        | 273                |                   | 2.21                                              |                                                             |
|           |           |                                                        | 298                |                   | 1.29                                              |                                                             |
|           | TT-TCBz-b | 1059                                                   | 263                |                   | 3.75                                              |                                                             |
|           |           |                                                        | 273                |                   | 3.00                                              |                                                             |
|           |           |                                                        | 298                |                   | 1.77                                              |                                                             |
|           | TT-TCBz-c | 523                                                    | 263                |                   | 2.24                                              |                                                             |
|           |           |                                                        | 273                |                   | 1.88                                              |                                                             |
|           |           |                                                        | 298                |                   | 1.10                                              |                                                             |
|           | TT-TCBz-d | 854                                                    | 263                |                   | 3.36                                              |                                                             |
|           |           |                                                        | 273                |                   | 2.76                                              |                                                             |
|           |           |                                                        | 298                |                   | 1.58                                              |                                                             |
|           | TT-TCBz-e | 832                                                    | 263                |                   | 3.61                                              |                                                             |
|           |           |                                                        | 273                |                   | 2.91                                              |                                                             |
| 298       |           |                                                        | 1.68               |                   |                                                   |                                                             |
| TT-TCBz-f | 821       | 263                                                    | 2.66               |                   |                                                   |                                                             |
|           |           | 273                                                    | 2.19               |                   |                                                   |                                                             |
|           |           | 298                                                    | 1.33               |                   |                                                   |                                                             |
| TT-TCBz-g | 848       | 263                                                    | 3.77               |                   |                                                   |                                                             |
|           |           | 273                                                    | 3.11               |                   |                                                   |                                                             |
|           |           | 298                                                    | 1.92               |                   |                                                   |                                                             |
| 2         | TT-CPP1   | 545                                                    | 263                | 1                 | 2.62                                              | <i>Mater. Adv.</i> , <b>2021</b> , <i>2</i> ,<br>7473-7481. |
|           |           |                                                        | 273                |                   | 2.18                                              |                                                             |
|           |           |                                                        | 298                |                   | 1.27                                              |                                                             |
|           | TT-CPP2   | 511                                                    | 263                |                   | 1.75                                              |                                                             |
|           |           |                                                        | 273                |                   | 1.63                                              |                                                             |
|           |           |                                                        | 298                |                   | 1.08                                              |                                                             |
|           | TT-CPP3   | 491                                                    | 263                |                   | 1.42                                              |                                                             |
|           |           |                                                        | 273                |                   | 1.22                                              |                                                             |
|           |           |                                                        | 298                |                   | 0.76                                              |                                                             |

|    |                                                                                                                                   |                                                 |                                               |           |                                                      |                                                                                    |
|----|-----------------------------------------------------------------------------------------------------------------------------------|-------------------------------------------------|-----------------------------------------------|-----------|------------------------------------------------------|------------------------------------------------------------------------------------|
| 3  | <b>DAT-2</b><br><br><b>DAT-1</b>                                                                                                  | 971<br><br>1105                                 | 273<br>298<br>313<br>273<br>298<br>313        | 30        | 20.6<br>9.9<br>8.3<br>73.3<br>18.1<br>12.6           | <i>J. CO2. Util</i> , <b>2022</b> , <i>65</i> , 102236.                            |
| 4  | <b>CNOP-1</b><br><br><b>CNOP-2</b>                                                                                                | 1374<br><br>1546                                | 273<br>298<br>273<br>298                      | 1         | 3.7<br>2.0<br>4.0<br>2.2                             | <i>Ind. Eng. Chem. Res.</i> , <b>2022</b> , <i>61</i> , 13453-13460.               |
| 5  | <b>Sf-PTOTCz</b>                                                                                                                  | 852                                             | 273<br>298                                    | 1         | 3.29<br>1.83                                         | <i>J. Solid State Chem.</i> , <b>2020</b> , <i>287</i> , 121327.                   |
| 6  | <b>CPOP-1</b>                                                                                                                     | 2220                                            | 273                                           | 1         | 4.82                                                 | <i>J. Am. Chem. Soc.</i> , <b>2012</b> , <i>134</i> , 6084-6087.                   |
| 7  | <b>CMP-LS1</b><br><br><b>CMP-LS2</b><br><br><b>CMP-LS3</b>                                                                        | 493<br><br>1576<br><br>643                      | 273<br>298<br>273<br>298<br>273<br>298        | 1         | 1.37<br>0.74<br>3.90<br>2.08<br>1.85<br>1.05         | <i>New J. Chem.</i> , <b>2018</b> , <i>42</i> , 9482-9487.                         |
| 8  | <b>SN@CMP-1</b><br><b>SN@CMP-2</b><br><b>SN@CMP-3</b><br><b>SN@CMP-4</b><br><b>SN@CMP-5</b><br><b>SN@CMP-6</b><br><b>SN@CMP-7</b> | 89<br>590<br>804<br>1143<br>1356<br>1172<br>804 | 273<br>273<br>273<br>273<br>273<br>273<br>273 | 1.05      | 1.08<br>1.53<br>2.38<br>2.64<br>2.89<br>3.86<br>2.72 | <i>New J. Chem.</i> , <b>2019</b> , <i>43</i> , 6838-6842.                         |
| 9  | <b>FcCMP-1</b><br><b>FcCMP-2</b>                                                                                                  | 638<br>422                                      | 273<br>273                                    | 1         | 2.2<br>1.6                                           | <i>Polymers</i> , <b>2020</b> , <i>12</i> , 719.                                   |
| 10 | <b>Py-azo-COP</b>                                                                                                                 | 700                                             | 273                                           | 1<br>15.5 | 1.93<br>4.14                                         | <i>ACS Omega</i> , <b>2017</b> , <i>2</i> , 3572–3582.                             |
| 11 | <b>COP-3</b><br><b>COP-3-rt</b><br><b>COP-3C</b><br><b>COP-3-600</b><br><b>COP-3-rt-600</b><br><b>COP-3C-600</b>                  | 1980<br>1490<br>940<br>1860<br>1370<br>950      | 273<br>273<br>273<br>273<br>273<br>273        | 1         | 4.6<br>3.5<br>2.1<br>5.2<br>5.4<br>4.3               | <i>Polym. Chem.</i> , <b>2016</b> , <i>7</i> , 1290-1296.                          |
| 12 | <b>Zn-CMP</b>                                                                                                                     | 791                                             | 298                                           | 1.01      | 1.33                                                 | <i>ChemSusChem</i> , <b>2014</b> , <i>7</i> , 2110–2114.                           |
| 13 | <b>CMP1</b><br><b>CMP2</b>                                                                                                        | 258<br>567                                      | 298                                           | 1         | 0.46<br>0.67                                         | <i>Polymer</i> , <b>2016</b> , <i>90</i> , 187–192.                                |
| 14 | <b>NWPTPE</b><br><b>NWPPYR</b>                                                                                                    | 508<br>824                                      | 298                                           | 1         | 0.68<br>0.93                                         | <i>J. Polym. Sci., Part A: Polym. Chem.</i> , <b>2017</b> , <i>55</i> , 3862–3867. |
| 15 | <b>HCTPP</b><br><b>HCTPA</b><br><b>HCTPM</b>                                                                                      | 582<br>921<br>670                               | 273                                           | 1         | 2.79<br>2.27<br>2.14                                 | <i>New J. Chem.</i> , <b>2017</b> , <i>41</i> , 3915–3919.                         |
| 16 | <b>TSP-1</b><br><br><b>TSP-2</b>                                                                                                  | 562<br><br>913                                  | 273<br>298<br>273<br>298                      | 1         | 3.0<br>1.9<br>4.1<br>2.6                             | <i>Chem. Commun.</i> , <b>2014</b> , <i>50</i> , 7933-7936.                        |
| 17 | <b>TCMP-0</b><br><br><b>CMP-0</b>                                                                                                 | 963<br><br>1018                                 | 273<br>298<br>273<br>298                      | 1         | 2.38<br>1.34<br>2.1<br>1.21                          | <i>Polym. Chem.</i> , <b>2012</b> , <i>3</i> , 928–934.                            |

|    |                             |      |     |      |        |                                                           |
|----|-----------------------------|------|-----|------|--------|-----------------------------------------------------------|
|    | <b>TNCMP-2</b>              | 995  | 273 |      | 2.62   |                                                           |
|    | <b>TCMP-3</b>               | 691  | 298 |      | 1.45   |                                                           |
|    | <b>TCMP-5</b>               | 494  | 273 |      | 2.25   |                                                           |
|    |                             |      | 298 |      | 1.26   |                                                           |
|    |                             |      | 273 |      | 1.22   |                                                           |
|    |                             |      | 298 |      | 0.68   |                                                           |
| 18 | <b>TPB-BD-CMP</b>           | 657  | 273 | 1    | 2.5    | <i>Mater. Chem. Front.</i> ,<br><b>2017</b> , 1, 867–872. |
|    | <b>TPA-BD-CMP</b>           | 543  |     |      | 2.94   |                                                           |
|    | <b>TPM-BD-CMP</b>           | 1008 |     |      | 3.78   |                                                           |
|    | <b>SPF-BD-CMP</b>           | 833  |     |      | 3.25   |                                                           |
| 19 | <b>P1</b>                   | 914  | 273 | 1    | 3.01   | <i>Chem. Eur. J.</i> , <b>2016</b> , 22,<br>7179–7183.    |
|    | <b>P2</b>                   | 834  |     |      | 2.53   |                                                           |
|    | <b>P3</b>                   | 873  |     |      | 2.12   |                                                           |
| 20 | <b>ACMP-C</b>               | 629  | 195 | 1.06 | 11.14. | <i>Macromolecules</i> , <b>2010</b> , 43,<br>5508–5511.   |
|    |                             |      | 273 |      | 1.56   |                                                           |
|    |                             |      | 298 |      | 1.08   |                                                           |
|    | <b>ACMP-C6</b>              | 380  | 195 |      | 9.97   |                                                           |
|    |                             |      | 273 |      | 0.79   |                                                           |
|    |                             |      | 298 |      | 0.54   |                                                           |
|    | <b>ACMP-N</b>               | 46   | 195 |      | 11.5   |                                                           |
|    |                             |      | 273 |      | 1.16   |                                                           |
|    |                             |      | 298 |      | 0.79   |                                                           |
| 21 | <b>CMP1</b>                 | 767  | 273 | 1    | 2.94   | <i>Macromolecules</i> , <b>2019</b> , 52,<br>3935–3941.   |
|    | <b>CMP2</b>                 | 624  |     |      | 2.7    |                                                           |
|    | <b>CMP3</b>                 | 780  |     |      | 2.37   |                                                           |
| 22 | <b>CMP-1-NH<sub>2</sub></b> | 656  | 273 | 1    | 1.65   | <i>Polymer</i> , <b>2014</b> , 55, 321–<br>325.           |
|    |                             |      | 298 |      | 0.96   |                                                           |
|    | <b>CMP-1-AMD1</b>           | 316  | 273 |      | 1.51   |                                                           |
|    |                             |      | 298 |      | 0.96   |                                                           |
|    | <b>CMP-1-AMD2</b>           | 264  | 273 |      | 1.46   |                                                           |
|    |                             |      | 298 |      | 0.92   |                                                           |
|    | <b>CMP-1-AMD3</b>           | 119  | 273 |      | 1.31   |                                                           |
|    |                             |      | 298 |      | 0.83   |                                                           |
|    | <b>CMP-1-AMD4</b>           | 59   | 273 |      | 1.13   |                                                           |
|    |                             |      | 298 |      | 0.71   |                                                           |
|    | <b>CMP-1-AMD5</b>           | 37   | 273 |      | 1.1    |                                                           |
|    |                             |      | 298 |      | 0.64   |                                                           |
|    | <b>CMP-1-AMD9</b>           | 68   | 273 |      | 0.87   |                                                           |
|    |                             |      | 298 |      | 0.54   |                                                           |
| 23 | <b>PP_CMP@mmm</b>           | 1928 | 273 | 1    | 2.52   | <i>Chem. Commun.</i> , <b>2014</b> , 50,<br>2781–2783.    |
|    |                             |      | 298 |      | 1.36   |                                                           |
|    | <b>PP_CMP@omp</b>           | 43   | 273 |      | 0.82   |                                                           |
|    |                             |      | 298 |      | 0.43   |                                                           |
|    | <b>PP_CMP@omom</b>          | 81   | 273 |      | 1.05   |                                                           |
|    |                             |      | 298 |      | 0.66   |                                                           |
| 24 | <b>Py-BF-CMP</b>            | 1306 | 273 | 1    | 3.21   | <i>Macromolecules</i> ,<br><b>2018</b> , 51, 3443–3449.   |
|    | <b>TPE-BF-CMP</b>           | 777  | 273 |      | 2.1    |                                                           |
|    | <b>TPA-BF-CMP</b>           | 590  | 273 |      | 1.83   |                                                           |
| 25 | <b>HP<sub>E</sub>-CMP</b>   | 662  | 273 | 1    | 3.58   | <i>RSC Adv.</i> , <b>2014</b> , 4, 6447–<br>6453.         |
|    |                             |      | 298 |      | 1.7    |                                                           |
| 26 | <b>CMP</b>                  | 772  | 298 | 1.01 | 1.61   | <i>Nat. Commun.</i> , <b>2013</b> , 4,<br>1960.           |
|    | <b>Co-CMP</b>               | 965  |     |      | 1.8    |                                                           |
|    | <b>Al-CMP</b>               | 798  |     |      | 1.74   |                                                           |
| 27 | <b>Cr-CMP</b>               | 738  | 298 | 1.01 | 1.63   | <i>J. Energy Chem.</i> , <b>2014</b> , 23,<br>22–28.      |

|    |                                                                                            |                           |                                                      |              |                                                              |                                                                            |
|----|--------------------------------------------------------------------------------------------|---------------------------|------------------------------------------------------|--------------|--------------------------------------------------------------|----------------------------------------------------------------------------|
| 28 | <b>AI-CMP</b>                                                                              | 839                       | 273<br>298                                           | 1.01         | 0.98<br>0.62                                                 | <i>RSC Adv.</i> , <b>2015</b> , 5, 31664–31669.                            |
| 29 | <b>NCMP-I</b><br><b>NCMP-III</b>                                                           | 945<br>593                | 273<br>298<br>273<br>298                             | 1            | 1.93<br>1.43<br>0.95<br>0.5                                  | <i>Macromol. Mater. Eng.</i> , <b>2016</b> , 301, 451–456.                 |
| 30 | <b>BQCMP-1</b><br><b>DQCMP-1</b>                                                           | 422<br>123                | 273<br>298<br>273<br>298                             | 1            | 1.55<br>1.06<br>1.09<br>0.86                                 | <i>Macromol. Mater. Eng.</i> , <b>2016</b> , 301, 1104–1110.               |
| 31 | <b>HCMP-1</b><br><b>HCMP-2</b><br><b>HCMP-3</b><br><b>HCMP-4</b>                           | 308<br>58<br>50<br>28     | 273<br>273<br>273<br>273                             | 1            | 1.7<br>1.23<br>1.16<br>0.98                                  | <i>Macromolecules</i> , <b>2016</b> , 49, 6322–6333.                       |
| 32 | <b>PTEB aerogel</b>                                                                        | 1701                      | 273                                                  | 1            | 3.47                                                         | <i>Adv. Mater.</i> , <b>2014</b> , 26, 8053–8058.                          |
| 33 | <b>CMP-PM</b><br><b>CMP-PM-Me</b>                                                          | 416<br>241                | 273<br>273                                           | 1.01         | 1.99<br>1.42                                                 | <i>Chem. Eur. J.</i> , <b>2018</b> , 24, 7480–7488.                        |
| 34 | <b>BO-CMP-1</b><br><b>BO-CMP-2</b><br><b>oBO-CMP-1</b><br><b>oBO-CMP-2</b>                 | 440<br>1030<br>390<br>540 | 273                                                  | 1            | 1.8<br>2.41<br>1.16<br>1.7                                   | <i>Macromolecules</i> , <b>2018</b> , 51, 947–953.                         |
| 35 | <b>CMP-1</b><br><b>CMP-1-(CH<sub>3</sub>)<sub>2</sub></b><br><b>CMP-1-(OH)<sub>2</sub></b> | 837<br>899<br>1043        | 298                                                  | 1            | 1.18<br>0.94<br>1.07                                         | <i>Chem. Sci.</i> , <b>2011</b> , 2, 1173–1177.                            |
| 36 | <b>BFCMP-1</b><br><b>BFCMP-2</b>                                                           | 1316<br>1470              | 273<br>298<br>273<br>298                             | 1.13         | 2.45<br>1.39<br>2.77<br>1.64                                 | <i>Polymer</i> , <b>2015</b> , 61, 36–41                                   |
| 37 | <b>PPTBC</b><br><b>PMTBC</b><br><b>PPETBC</b><br><b>PMETBC</b>                             | 917<br>704<br>702<br>540  | 273<br>298<br>273<br>298<br>273<br>298<br>273<br>298 | 1.13         | 2.93<br>1.71<br>2.86<br>1.79<br>2.23<br>1.25<br>1.96<br>1.09 | <i>Macromol. Chem. Phys.</i> , <b>2015</b> , 216, 504–510.                 |
| 38 | <b>MFCMP-1</b>                                                                             | 840                       | 273                                                  | 1            | 3.69                                                         | <i>J. Mater. Chem. A</i> , <b>2014</b> , 2, 13422–13430.                   |
| 39 | <b>CMP-YA</b><br><b>CMP-SO-1B2</b><br><b>CMP-SO-1B3</b>                                    | 1410<br>1085<br>1080      | 273<br>298<br>273<br>298<br>273<br>298               | 1            | 1.25<br>1.9<br>1.19<br>1.92<br>1.22<br>1.89                  | <i>Macromolecules</i> , <b>2017</b> , 50, 4993–5003.                       |
| 40 | <b>CK-COP-1</b><br><b>CK-COP-2</b>                                                         | 54<br>615                 | 273                                                  | 1            | 0.65<br>2.21                                                 | <i>J. Polym. Sci., Part A: Polym. Chem.</i> , <b>2017</b> , 55, 2383–2389. |
| 41 | <b>ThPOP-1</b><br><b>ThPOP-2</b>                                                           | 1050<br>160               | 273                                                  | 1            | 3.41<br>0.91                                                 | <i>Polym. Chem.</i> , <b>2016</b> , 7, 5031–5038.                          |
| 42 | <b>Porp-TPE</b><br><b>Porp-Py-CMP</b>                                                      | 547<br>31                 | 273<br>273                                           | 1.05<br>1.05 | 2.09<br>1.29                                                 | <i>Polym. Chem.</i> , <b>2019</b> , 10, 819–822.                           |
| 43 | <b>Por-Py-CMP</b>                                                                          | 1014                      | 273                                                  | 1            | 3                                                            | <i>RSC Adv.</i> , <b>2016</b> , 6,                                         |

|    |                       |      |     |      |      |                                                            |
|----|-----------------------|------|-----|------|------|------------------------------------------------------------|
|    |                       |      | 298 |      | 1.86 | 75478–75481.                                               |
| 44 | <b>DA-CMP1</b>        | 662  | 273 | 1.13 | 2.28 | <i>J. Mater. Chem. A</i> , <b>2015</b> , 3, 21185–21193.   |
|    | <b>DA-CMP2</b>        | 603  | 298 |      | 1.35 |                                                            |
|    | <b>Azo-CMP1</b>       | 1146 | 273 |      | 1.64 |                                                            |
|    | <b>Azo-CMP2</b>       | 898  | 298 |      | 0.95 |                                                            |
|    |                       |      | 273 |      | 3.72 |                                                            |
|    |                       |      | 298 |      | 2.15 |                                                            |
|    |                       |      | 272 |      | 3.17 |                                                            |
|    |                       |      | 298 |      | 1.96 |                                                            |
| 45 | <b>SCMP-COOH@1</b>    | 911  | 298 | 1    | 1.39 | <i>Polym. Chem.</i> , <b>2016</b> , 7, 4599–4602.          |
|    | <b>SCMP-COOH@2</b>    | 622  |     |      | 1.07 |                                                            |
|    | <b>SCMP-COOH@3</b>    | 820  |     |      | 1.25 |                                                            |
| 46 | <b>ZnP-5N3-CMPs</b>   | 711  | 273 | 1    | 1    | <i>Chem. Commun.</i> , <b>2017</b> , 53, 11422–11425.      |
|    |                       |      | 298 |      | 0.59 |                                                            |
|    | <b>ZnP-25N3-CMPs</b>  | 685  | 273 |      | 1.23 |                                                            |
|    |                       |      | 298 |      | 0.7  |                                                            |
|    | <b>ZnP-50N3-CMPs</b>  | 654  | 273 |      | 1.98 |                                                            |
|    |                       |      | 298 |      | 1.11 |                                                            |
|    | <b>ZnP-75N3-CMPs</b>  | 565  | 273 |      | 1.64 |                                                            |
|    |                       |      | 298 |      | 0.98 |                                                            |
|    | <b>ZnP-100N3-CMPs</b> | 477  | 273 |      | 1.57 |                                                            |
|    |                       |      | 298 |      | 0.91 |                                                            |
|    | <b>ZnP-5F-CMPs</b>    | 430  | 273 |      | 1.32 |                                                            |
|    |                       |      | 298 |      | 0.77 |                                                            |
|    | <b>ZnP-25F-CMPs</b>   | 352  | 273 |      | 1.91 |                                                            |
|    |                       |      | 298 |      | 1.18 |                                                            |
|    | <b>ZnP-50F-CMPs</b>   | 240  | 273 |      | 2.95 |                                                            |
|    |                       |      | 298 |      | 2.04 |                                                            |
| 47 | <b>PCZN-1</b>         | 1003 | 273 | 1    | 2.57 | <i>Polym. Chem.</i> , <b>2017</b> , 8, 7240–7247.          |
|    | <b>PCZN-2</b>         | 607  |     |      | 2.36 |                                                            |
|    | <b>PCZN-3</b>         | 714  |     |      | 2.54 |                                                            |
|    | <b>PCZN-4</b>         | 374  |     |      | 2.02 |                                                            |
|    | <b>PCZN-5</b>         | 707  |     |      | 2.29 |                                                            |
|    | <b>PCZN-6</b>         | 718  |     |      | 2.82 |                                                            |
|    | <b>PCZN-7</b>         | 1058 |     |      | 2.91 |                                                            |
|    | <b>PCZN-8</b>         | 1126 |     |      | 3.18 |                                                            |
|    | <b>PCZN-9</b>         | 690  |     |      | 2.93 |                                                            |
|    | <b>PCZN-10</b>        | 391  |     |      | 1.7  |                                                            |
| 48 | <b>PCTF-8</b>         | 625  | 273 | 1    | 2.47 | <i>J. Mater. Chem. A</i> , <b>2016</b> , 4, 13450–13457.   |
|    |                       |      | 293 |      | 1.41 |                                                            |
| 49 | <b>BCMP3</b>          | 950  | 273 | 1    | 2.41 | <i>Chem. Eur. J.</i> , <b>2015</b> , 21, 17355–17362.      |
|    |                       |      | 298 |      | 1.61 |                                                            |
| 50 | <b>LKK-CMP-1</b>      | 467  | 273 | 1    | 2.22 | <i>Ind. Eng. Chem. Res.</i> , <b>2018</b> , 57, 9254–9260. |
|    |                       |      | 298 |      | 1.38 |                                                            |
| 51 | <b>PCTF-1</b>         | 2235 | 273 | 1    | 3.22 | <i>Chem. Commun.</i> , <b>2013</b> , 49, 3961–3963.        |
|    |                       |      | 298 |      | 1.84 |                                                            |
|    | <b>PCTF-2</b>         | 784  | 273 |      | 1.82 |                                                            |
|    |                       |      | 298 |      | 0.99 |                                                            |
| 52 | <b>CPOP-8</b>         | 1610 | 273 | 1    | 3.75 | <i>Macromolecules</i> , <b>2014</b> , 47, 5926–5931.       |
|    | <b>CPOP-9</b>         | 2440 |     |      | 4.13 |                                                            |
|    | <b>CPOP-10</b>        | 1110 |     |      | 3.36 |                                                            |
| 53 | <b>PTA-1</b>          | 52   | 273 | 1    | 0.84 | <i>Chem. Commun.</i> , <b>2014</b> , 50, 8002–8005.        |
|    | <b>PTA-2</b>          | 62   | 273 |      | 1.25 |                                                            |
|    |                       |      | 303 |      | 0.59 |                                                            |
|    | <b>PTA-3</b>          | 450  | 273 |      | 1.48 |                                                            |

|    |                                   |      |     |      |      |                                                                      |
|----|-----------------------------------|------|-----|------|------|----------------------------------------------------------------------|
|    |                                   |      | 303 |      | 0.77 |                                                                      |
| 54 | <b>BILP-101</b>                   | 536  | 298 | 1    | 2.43 | <i>Chem. Commun.</i> , <b>2015</b> , <i>51</i> , 13393–13396.        |
| 55 | <b>PAF-33</b>                     | 821  | 273 | 1    | 2.16 | <i>Polym. Chem.</i> , <b>2014</b> , <i>5</i> , 2266–2272.            |
|    | <b>PAF-33-NH<sub>2</sub></b>      | 370  | 298 |      | 1.25 |                                                                      |
|    |                                   |      | 273 |      | 1.19 |                                                                      |
|    | <b>PAF-33-COOH</b>                | 445  | 298 |      | 0.75 |                                                                      |
|    |                                   |      | 273 |      | 1.94 |                                                                      |
|    | <b>PAF-34</b>                     | 953  | 298 |      | 1.21 |                                                                      |
|    |                                   |      | 273 |      | 2.5  |                                                                      |
|    | <b>PAF-34-OH</b>                  | 771  | 298 | 1.39 |      |                                                                      |
|    |                                   |      | 273 | 2.21 |      |                                                                      |
|    | <b>PAF-35</b>                     | 567  | 298 | 1.25 |      |                                                                      |
|    |                                   |      | 273 | 1.77 |      |                                                                      |
|    |                                   |      | 298 | 1.01 |      |                                                                      |
| 56 | <b>Cu/BF<sub>4</sub>/BIPLPL-1</b> | 380  | 273 | 1    | 2.57 | <i>J. Phys. Chem. C</i> , <b>2015</b> , <i>119</i> , 8174–8182.      |
| 57 | <b>BILP-15</b>                    | 448  | 273 | 1    | 2.68 | <i>Environ. Sci. Technol.</i> , <b>2015</b> , <i>49</i> , 4715–4723. |
|    |                                   |      | 298 |      | 1.82 |                                                                      |
|    | <b>BILP-16</b>                    | 435  | 273 |      | 2.7  |                                                                      |
|    |                                   |      | 298 |      | 1.83 |                                                                      |
|    | <b>BILP-15(AC)</b>                | 862  | 273 |      | 3.43 |                                                                      |
|    |                                   |      | 298 | 2.29 |      |                                                                      |
|    | <b>BILP-16(AC)</b>                | 843  | 273 | 3.46 |      |                                                                      |
|    |                                   |      | 298 | 2.32 |      |                                                                      |
| 58 | <b>TBILP-1</b>                    | 117  | 273 | 1    | 2.91 | <i>Macromolecules</i> , <b>2014</b> , <i>47</i> , 8328–8334.         |
|    |                                   |      | 298 |      | 1.98 |                                                                      |
| 59 | <b>BILP-10</b>                    | 787  | 273 | 1    | 4.02 | <i>J. Mater. Chem. A</i> , <b>2014</b> , <i>2</i> , 12492–12500.     |
|    |                                   |      | 298 |      | 2.52 |                                                                      |
|    | <b>BILP-11</b>                    | 658  | 273 |      | 3.09 |                                                                      |
|    |                                   |      | 298 |      | 2    |                                                                      |
|    | <b>BILP-13</b>                    | 677  | 273 | 2.57 |      |                                                                      |
|    |                                   |      | 298 | 1.8  |      |                                                                      |
| 60 | <b>NPOF-1</b>                     | 2062 | 298 | 1    | 1.52 | <i>J. Phys. Chem. C</i> , <b>2016</b> , <i>120</i> , 2592–2599.      |
|    | <b>NPOF-1-NO<sub>2</sub></b>      | 1295 |     |      | 2.52 |                                                                      |
|    | <b>NPOF-1-NO<sub>2</sub>(xs)</b>  | 749  |     |      | 2    |                                                                      |
|    | <b>NPOF-1-NH<sub>2</sub></b>      | 1535 |     |      | 3.77 |                                                                      |
|    | <b>NPOF-1-NH<sub>2</sub>(xs)</b>  | 1074 |     |      | 2.93 |                                                                      |
| 61 | <b>ALP-5</b>                      | 801  | 273 | 1    | 4.46 | <i>J. Mater. Chem. A</i> , <b>2015</b> , <i>3</i> , 20586–20594.     |
|    |                                   |      | 298 |      | 2.94 |                                                                      |
|    | <b>ALP-6</b>                      | 698  | 273 |      | 3.42 |                                                                      |
|    |                                   |      | 298 |      | 2.17 |                                                                      |
|    | <b>ALP-7</b>                      | 412  | 273 |      | 2.5  |                                                                      |
|    |                                   |      | 298 |      | 1.55 |                                                                      |
|    | <b>ALP-8</b>                      | 517  | 273 |      | 3.05 |                                                                      |
|    |                                   |      | 298 |      | 1.97 |                                                                      |

**Table S4.** Summary of the CO<sub>2</sub>/N<sub>2</sub>: 15/85 (v/v) selectivity data of various POPs (<sup>a</sup> at 273 K and 1 bar, <sup>b</sup> at 298 K and 1 bar)

| Entry | Material     | S <sub>BET</sub><br>(m <sup>2</sup> g <sup>-1</sup> ) | CO <sub>2</sub> uptake<br>(mmol g <sup>-1</sup> ) |       | CO <sub>2</sub> /N <sub>2</sub><br>selectivity | Reference                                                                   |
|-------|--------------|-------------------------------------------------------|---------------------------------------------------|-------|------------------------------------------------|-----------------------------------------------------------------------------|
|       |              |                                                       | 273 K                                             | 298 K |                                                |                                                                             |
| 1     | TT-TCBz-b    | 1059                                                  | 3.00                                              | 1.77  | 24.5 <sup>b</sup>                              | This work                                                                   |
|       | TT-TCBz-g    | 848                                                   | 3.11                                              | 1.92  | 65.0 <sup>b</sup>                              |                                                                             |
| 2     | CTF-1        | 746                                                   | 3.00                                              | 1.41  | 20 <sup>a</sup>                                | <i>Energy Environ. Sci.</i> , <b>2013</b> , <i>6</i> , 3684-3692.           |
|       | CTF-1-600    | 1553                                                  | 3.82                                              | 2.25  | 13 <sup>a</sup>                                |                                                                             |
|       | FCTF-1       | 662                                                   | 4.67                                              | 3.21  | 31 <sup>a</sup>                                |                                                                             |
|       | FCTF-1-600   | 1535                                                  | 5.53                                              | 3.41  | 19 <sup>a</sup>                                |                                                                             |
| 3     | F-DCBP-CTF-1 | 1574                                                  | 5.98                                              | 3.82  | 31 <sup>b</sup>                                | <i>J. Mater. Chem. A.</i> , <b>2018</b> , <i>6</i> , 6370-6375.             |
| 4     | CTF-3        | 1454                                                  | 2.13                                              | 1.34  | 24.5 <sup>a</sup>                              | <i>J. Mater. Chem. A.</i> , <b>2019</b> , <i>7</i> , 17277-17282.           |
| 5     | CQN-1g       | 1870                                                  | 7.16                                              | 4.57  | 42.7 <sup>b</sup>                              | <i>Angew. Chem., Int. Ed.</i> , <b>2019</b> , <i>58</i> , 872-876.          |
| 6     | BTAP-1       | 750.9                                                 | 3.26                                              | 1.78  | 40 <sup>a</sup>                                | <i>Chem.</i> , <b>2016</b> , <i>1</i> , 482-493.                            |
|       | BTAP-2       | 445.6                                                 | 2.55                                              | 2.23  | 52 <sup>a</sup>                                |                                                                             |
|       | BTAP-3       | 419.9                                                 | 1.58                                              | 1.41  | 62 <sup>a</sup>                                |                                                                             |
| 7     | BTLP-4       | 1011                                                  | 4.3                                               | 2.7   | 41 <sup>a</sup>                                | <i>J. Mater. Chem. A.</i> , <b>2017</b> , <i>5</i> , 258-265.               |
|       | BTLP-5       | 705                                                   | 3.2                                               | 1.98  | 45 <sup>a</sup>                                |                                                                             |
|       | BOLP-4       | 698                                                   | 3.1                                               | 2.0   | 79 <sup>a</sup>                                |                                                                             |
|       | BOLP-5       | 759                                                   | 2.9                                               | 1.8   | 95 <sup>a</sup>                                |                                                                             |
| 8     | BILP-4       | 1134                                                  | 5.3                                               | 3.6   | 79 <sup>a</sup>                                | <i>Chem. Mater.</i> , <b>2012</b> , <i>24</i> , 1511-1517.                  |
|       | BILP-5       | 599                                                   | 2.9                                               | 2.0   | 95 <sup>a</sup>                                |                                                                             |
| 9     | Th-1         | 726                                                   | 2.88                                              | -     | 39 <sup>a</sup>                                | <i>Adv. Mater.</i> , <b>2012</b> , <i>24</i> , 5703-5707.                   |
|       | Py-1         | 437                                                   | 2.71                                              | -     | 117 <sup>a</sup>                               |                                                                             |
|       | Fu-1         | 514                                                   | 2.21                                              | -     | 50 <sup>a</sup>                                |                                                                             |
| 10    | HMC-1        | 855                                                   | 5.8                                               | -     | 72 <sup>a</sup>                                | <i>ACS Sustain. Chem. Eng.</i> , <b>2016</b> , <i>4</i> , 3697-3703.        |
|       | HMC-2        | 425                                                   | 6.6                                               | -     | 70 <sup>a</sup>                                |                                                                             |
|       | HMC-3        | 566                                                   | 7.1                                               | -     | 23 <sup>a</sup>                                |                                                                             |
| 11    | Tt-POP-1     | 258                                                   | 0.75                                              | 0.29  | 30 <sup>a</sup>                                | <i>ACS Appl. Nano Mater.</i> , <b>2022</b> , <i>5</i> , 5302-5315.          |
|       | Tt-POP-2     | 368                                                   | 0.91                                              | 0.49  | 26 <sup>a</sup>                                |                                                                             |
|       | Tt-POP-3     | 974                                                   | 0.78                                              | 0.45  | 25 <sup>a</sup>                                |                                                                             |
| 12    | TAP1         | 474                                                   | 2.2                                               | 1.4   | 94 <sup>a</sup>                                | <i>ACS Appl. Polym. Mater.</i> , <b>2019</b> , <i>1</i> , 959-968.          |
|       | TAP2         | 772                                                   | 3.2                                               | 2.3   | 112 <sup>a</sup>                               |                                                                             |
|       | TAP3         | 729                                                   | 3.4                                               | 2.3   | 114 <sup>a</sup>                               |                                                                             |
| 13    | PFPOP-1      | 570                                                   | 2.8                                               | 1.2   | 43.7 <sup>b</sup>                              | <i>RSC Adv.</i> , <b>2015</b> , <i>5</i> , 71095-71101.                     |
|       | PFPOP-2      | 630                                                   | 3.4                                               | 1.5   | 52.1 <sup>b</sup>                              |                                                                             |
|       | PFPOP-3      | 530                                                   | 3.9                                               | 1.7   | 56.5 <sup>b</sup>                              |                                                                             |
| 14    | PMOP         | 1604                                                  | 5.00                                              | 3.17  | 47.1 <sup>a</sup>                              | <i>ACS Appl. Mater. Interfaces</i> , <b>2018</b> , <i>10</i> , 15174-15182. |
| 15    | TBOSBL1      | 649                                                   | 4.0                                               | 2.1   | 68 <sup>a</sup>                                | <i>ACS Omega</i> , <b>2020</b> , <i>5</i> , 4250-4260.                      |
|       | TBOSBL2      | 570                                                   | 3.4                                               | 2.6   | 106 <sup>a</sup>                               |                                                                             |
|       | TBOSBL3      | 493                                                   | 2.8                                               | 2.2   | 108 <sup>a</sup>                               |                                                                             |
| 16    | COP-190H-en  | 456                                                   | 3.6                                               | 2.19  | 171 <sup>b</sup>                               | <i>Micropor. Mesopor. Mat.</i> , <b>2021</b> ,                              |

|    |                       |      |      |      |                  |                                                                  |
|----|-----------------------|------|------|------|------------------|------------------------------------------------------------------|
|    | <b>COP-190H0-deta</b> | 72   | 2.7  | 1.79 | 121 <sup>b</sup> | 328, 111450.                                                     |
|    | <b>COP-190H-CN</b>    | 661  | 3.2  | 2.11 | 91 <sup>b</sup>  |                                                                  |
|    | <b>COP-190H-SH</b>    | 773  | 3.6  | 2.28 | 76 <sup>b</sup>  |                                                                  |
| 17 | <b>CPOP-1</b>         | 2220 | 4.82 | -    | 25 <sup>a</sup>  | <i>J. Am. Chem. Soc.</i> , <b>2012</b> , <i>134</i> , 6084-6087. |

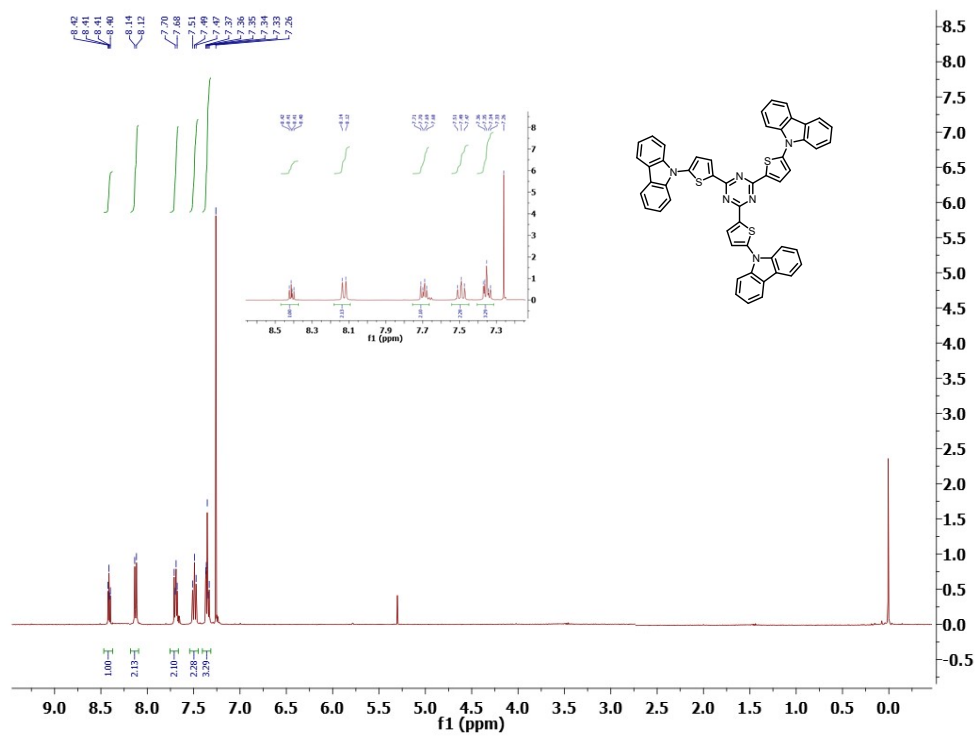

**Figure S9.** <sup>1</sup>H NMR Spectrum of TT-TCBz



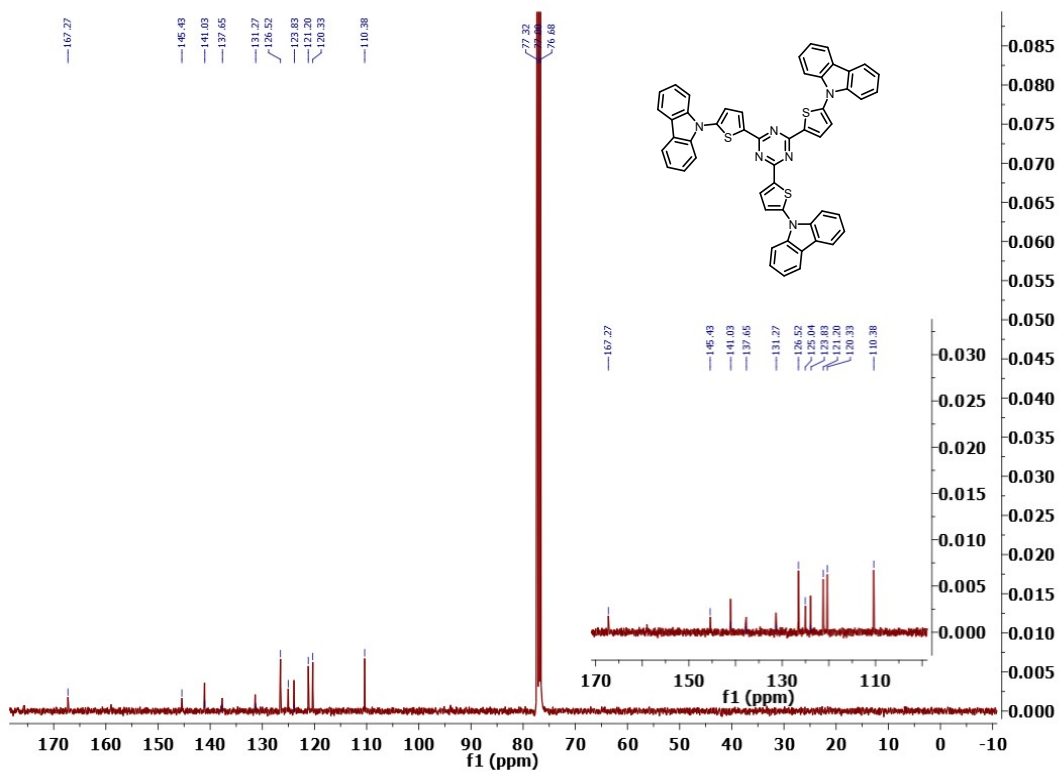

Figure S10.  $^{13}\text{C}$  NMR Spectra of TT-TCBz

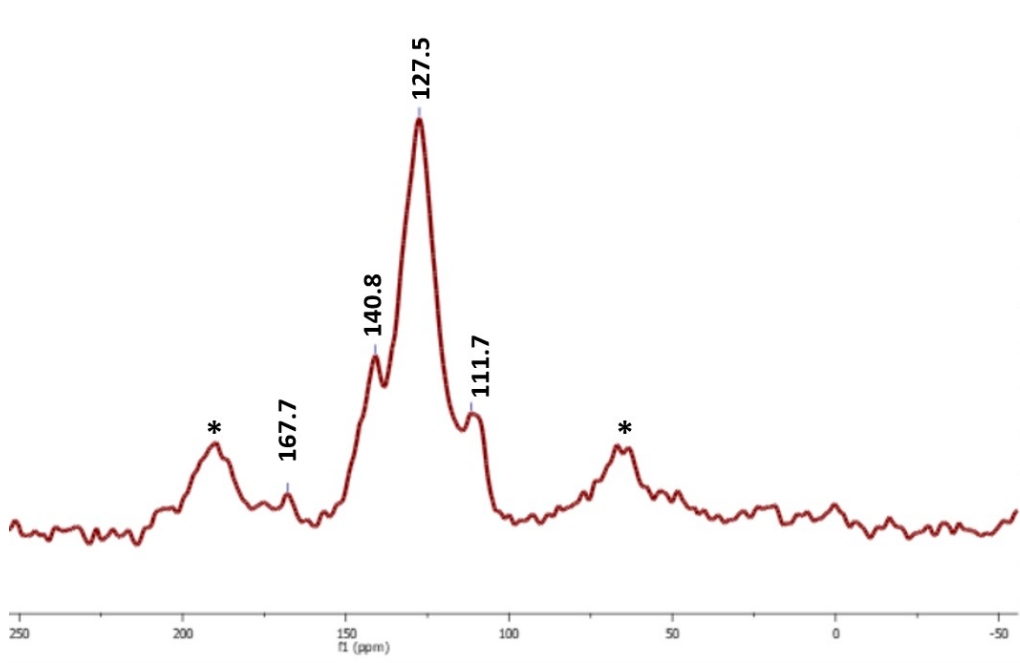

Figure S11. Solid-state  $^{13}\text{C}$  NMR spectra of TT-TCBz-c (\* mark represent the spinning sidebands)

## References

- <sup>1</sup> R. Maragani and R. Misra, *Tetrahedron Lett.*, 2013, **54**, 5399-5402.
- <sup>2</sup> K. Smith, D. M. James, A. G. Mistry, M. R. Bye and D. J. Faulkner, *Tetrahedron*, 1992, **48**, 36, 7479-7488.
- <sup>3</sup> Y. Yuan, H. Hunag, L. Chen and Y. Chen, *Macromolecules*, 2017, **50**, 13, 4993-5003.
- <sup>4</sup> Q. Chen, M. Luo, P. Hammershoj, D. Zhou, Y. Han, B. W. Laursen, C. G. Yan and B. H. Han, *J. Am. Chem. Soc.*, 2012, **134**, 14, 6084-6087.
- <sup>5</sup> Z. Li, H. Ishizuka, Y. Sei, M. Akita and M. Yoshizawa, *Chem. Asian J.*, 2012, **7**, 8, 1789-1794.
